# Supplementary material
Source: PubMed Central journal article supplement (PMC2494918)
Supplement: M709156200_1.pdf [file M709156200_1.pdf]

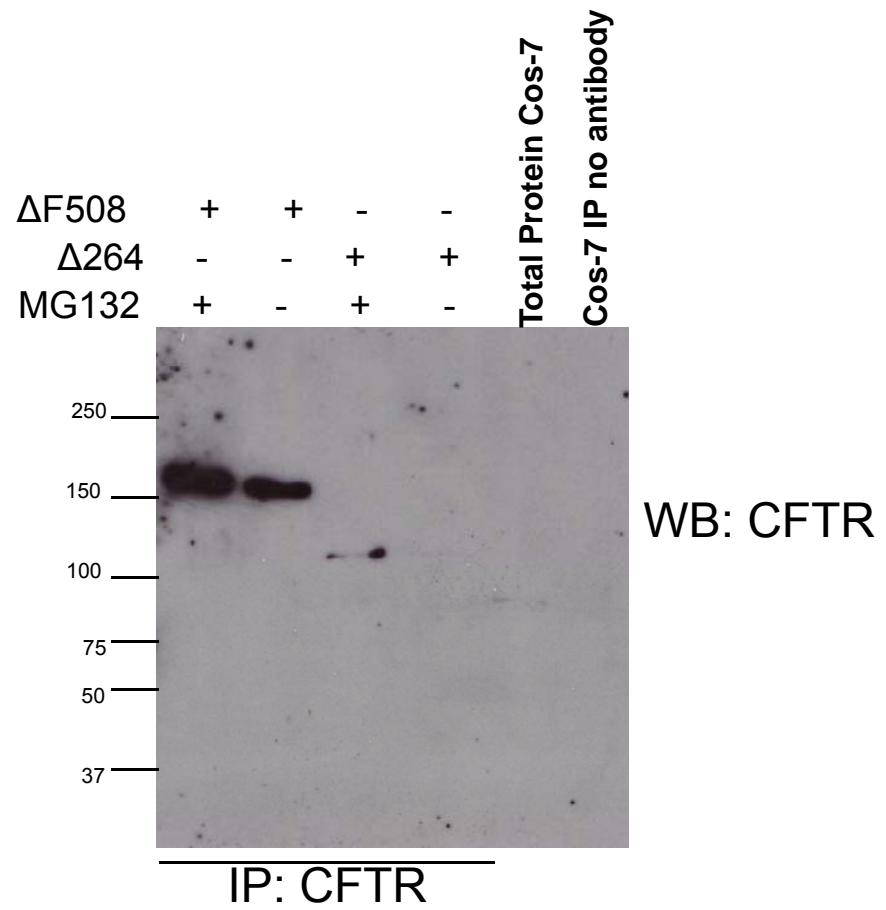

**Supplement Figure 1**

**Supplement Figure 1. Immunoprecipitation of both  $\Delta$ F508 CFTR and  $\Delta$ 264 CFTR.** Cos-7 cells were transfected with  $\Delta$ F508 or  $\Delta$ 264 CFTR and treated with 10 $\mu$ M MG-132 for 8 hrs. CFTR was immunoprecipitated (IP) from 500 $\mu$ g total protein and immunoblotted for CFTR. Protein from non-CFTR transfected Cos-7 cells was used as a negative control for CFTR IP while total protein extract (25 $\mu$ g) of non-transfected Cos-7 was used as a positive control.
